# Supplementary material
Source: PubMed Central journal article supplement (PMC3867965)
Supplement: cn400151a_si_001.pdf [file cn400151a_si_001.pdf]

# **Tau-Derived-Hexapeptide <sup>306</sup>VQIVYK<sup>311</sup> Aggregation Inhibitors: Nitrocatechol**

## **Moiety As A Pharmacophore In Drug Design**

Tarek Mohamed <sup>1,2</sup>, Tuan Hoang <sup>3,4</sup>, Masoud Jelokhani-Niaraki <sup>3,4</sup> and Praveen P. N. Rao <sup>1,\*</sup>

### **Supporting Information**

#### **Contents:**

|                                                                                                                                  |    |
|----------------------------------------------------------------------------------------------------------------------------------|----|
| 1. Figure S1: Tau-hexapeptide aggregation in the presence of dopamine ( <b>3</b> ) and epinephrine ( <b>4</b> )                  | 2  |
| 2. Figure S2: Tau-hexapeptide aggregation in the presence of nitrocatechol isomer ( <b>8</b> ) and nitrophenol ( <b>10</b> )     | 3  |
| 3. Figure S3: Tau-hexapeptide aggregation in the presence of chloramphenicol ( <b>5</b> ) and nifedipine ( <b>6</b> )            | 4  |
| 4. Figure S4 Tau-hexapeptide aggregation in the presence of nitrobenzene ( <b>11</b> ) and nitroanthracene ( <b>12</b> )         | 5  |
| 5. Figure S5: Tau-hexapeptide aggregation in the presence of methylbenzophenone ( <b>13</b> )                                    | 6  |
| 6. Figure S6: UV absorption scan of test compounds                                                                               | 7  |
| 7. Figure S7: Fluorescence data of test compounds                                                                                | 8  |
| 8. Figure S8: Fluorescence data in presence of ThS and test compounds ( <b>1</b> , <b>2</b> , <b>7</b> and <b>8</b> )            | 9  |
| 9. Figure S9: Disaggregation kinetics of test compounds                                                                          | 10 |
| 10. Figure S10: Binding modes of dopamine ( <b>3</b> ) and catechol ( <b>9</b> ) with the steric zipper model of tau-hexapeptide | 11 |
| 11. Table S1: The partition coefficient values (ClogP) of test compounds ( <b>1–13</b> )                                         | 12 |

**Figure S1:** The effect of various concentrations of dopamine **3** (panel A) and epinephrine **4** (panel B) on AcPHF6 aggregation (in triplicates from two independent experiments).

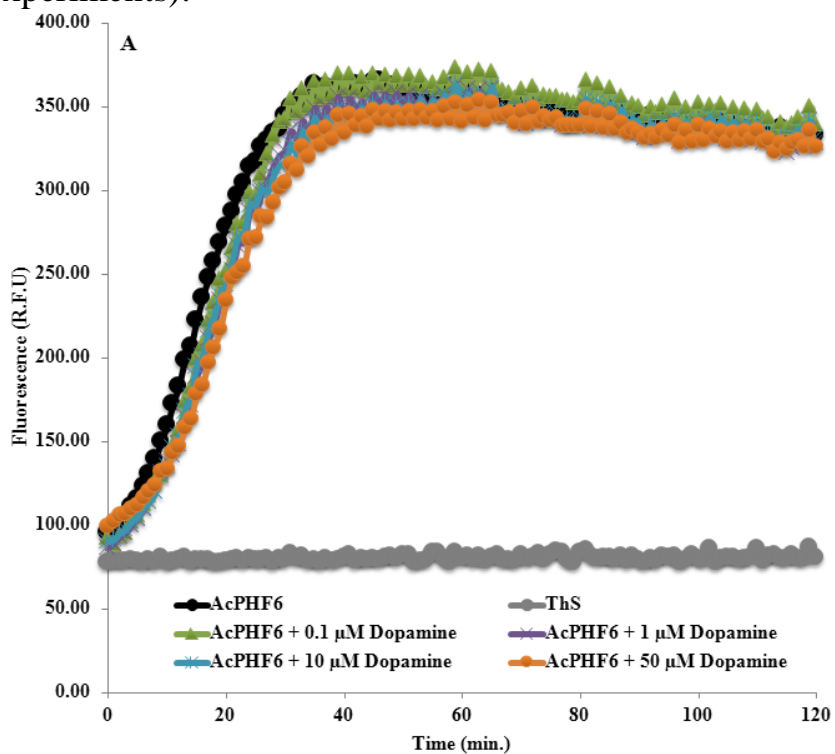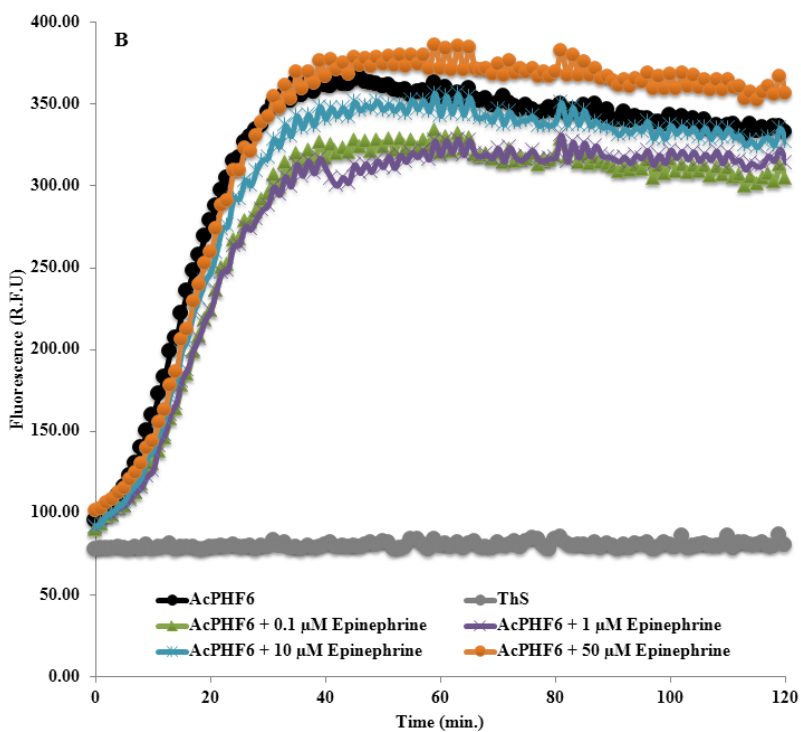

**Figure S2:** The effect of various concentrations of nitrocatechol isomer **8**, panel A and nitrophenol **10** in panel B on AcPHF6 aggregation (in triplicates from two independent experiments).

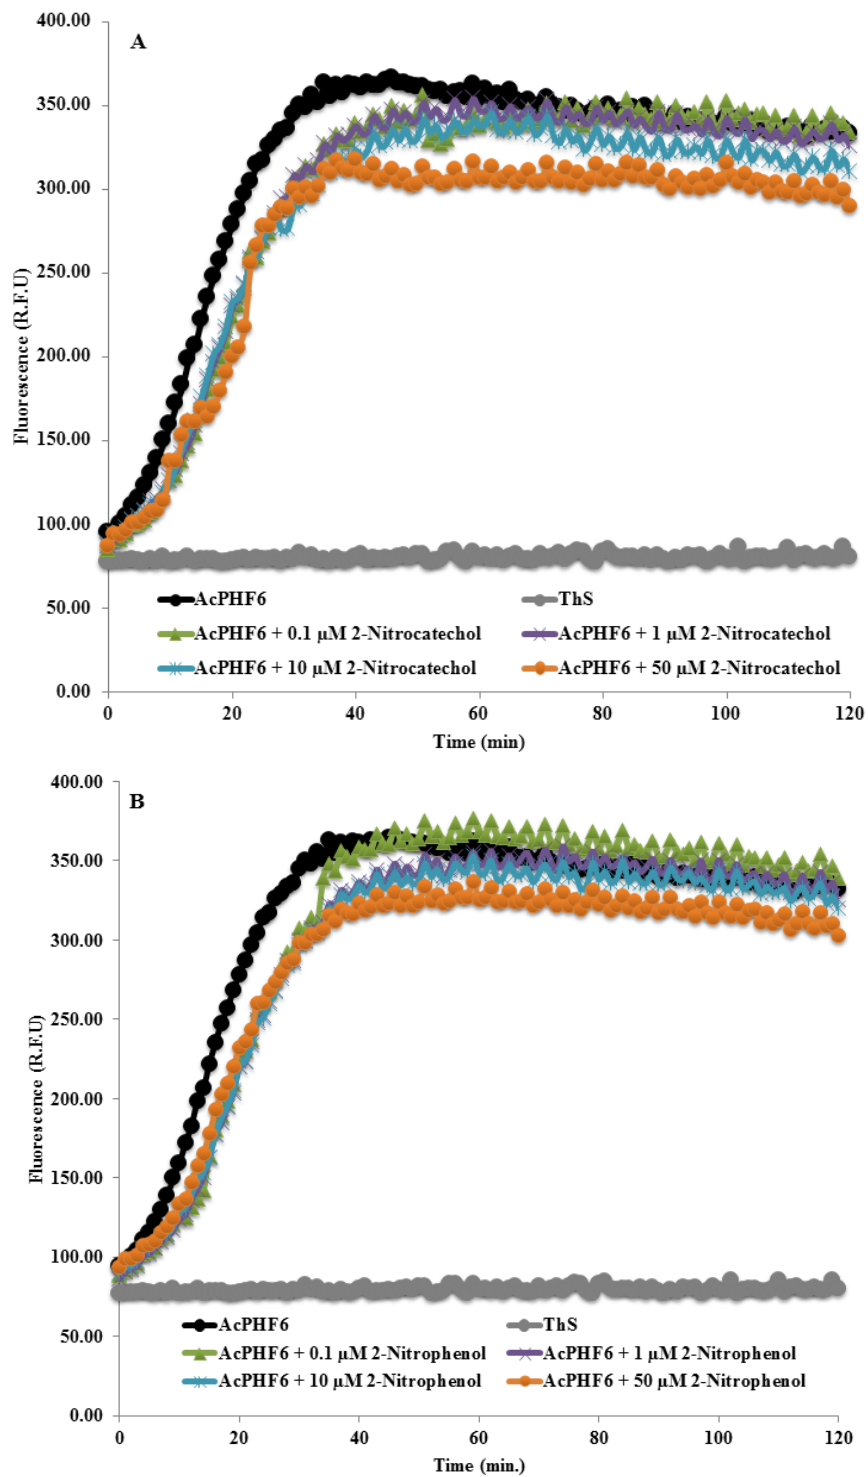

**Figure S3:** The effect of various concentrations of chloramphenicol **5**, panel A and nifedipine **6** in panel B on AcPHF6 aggregation (in triplicates from two independent experiments).

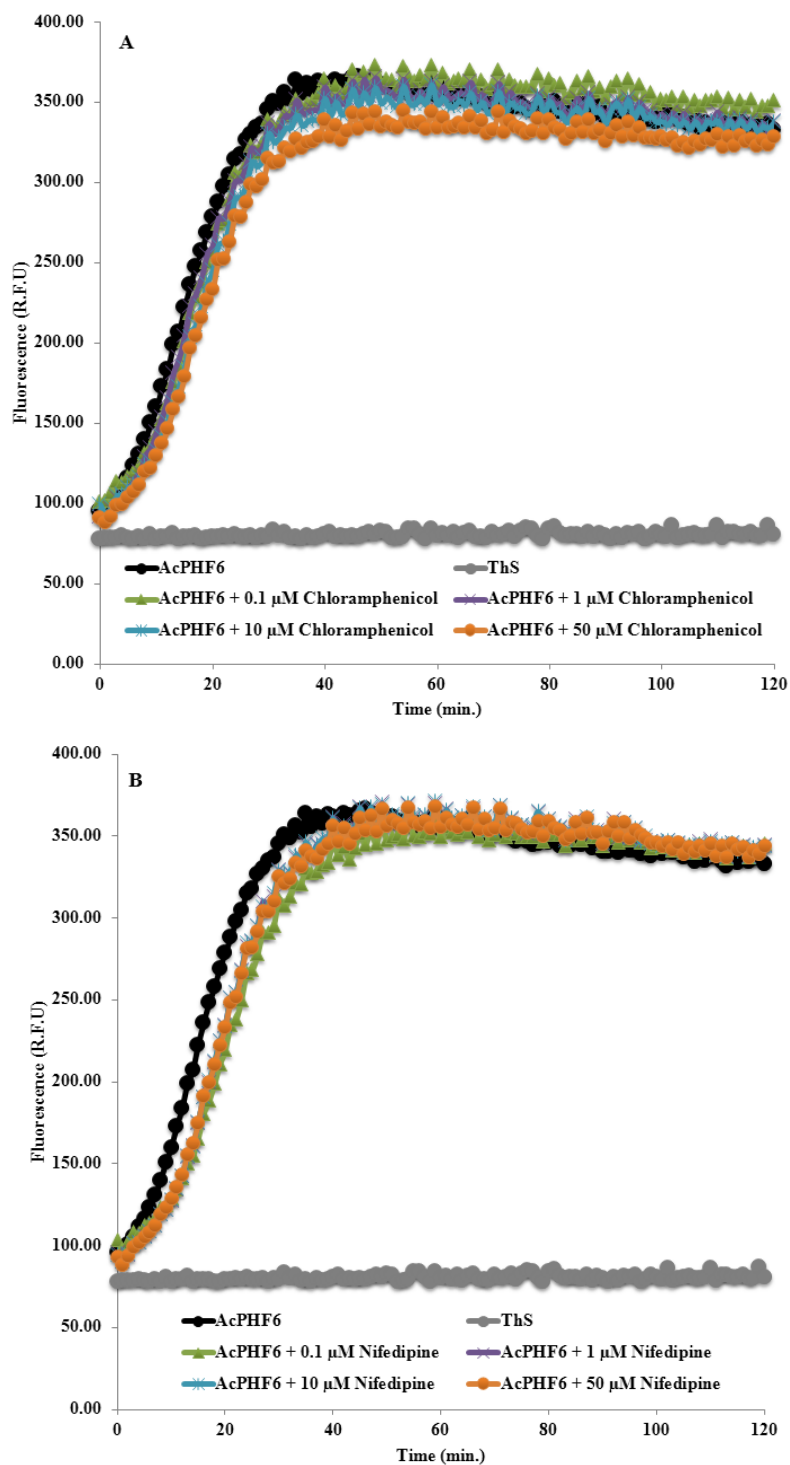

**Figure S4:** The effect of various concentrations of nitrobenzene **11**, panel A and nitroanthracene **12** in panel B on AcPHF6 aggregation (in triplicates from two independent experiments).

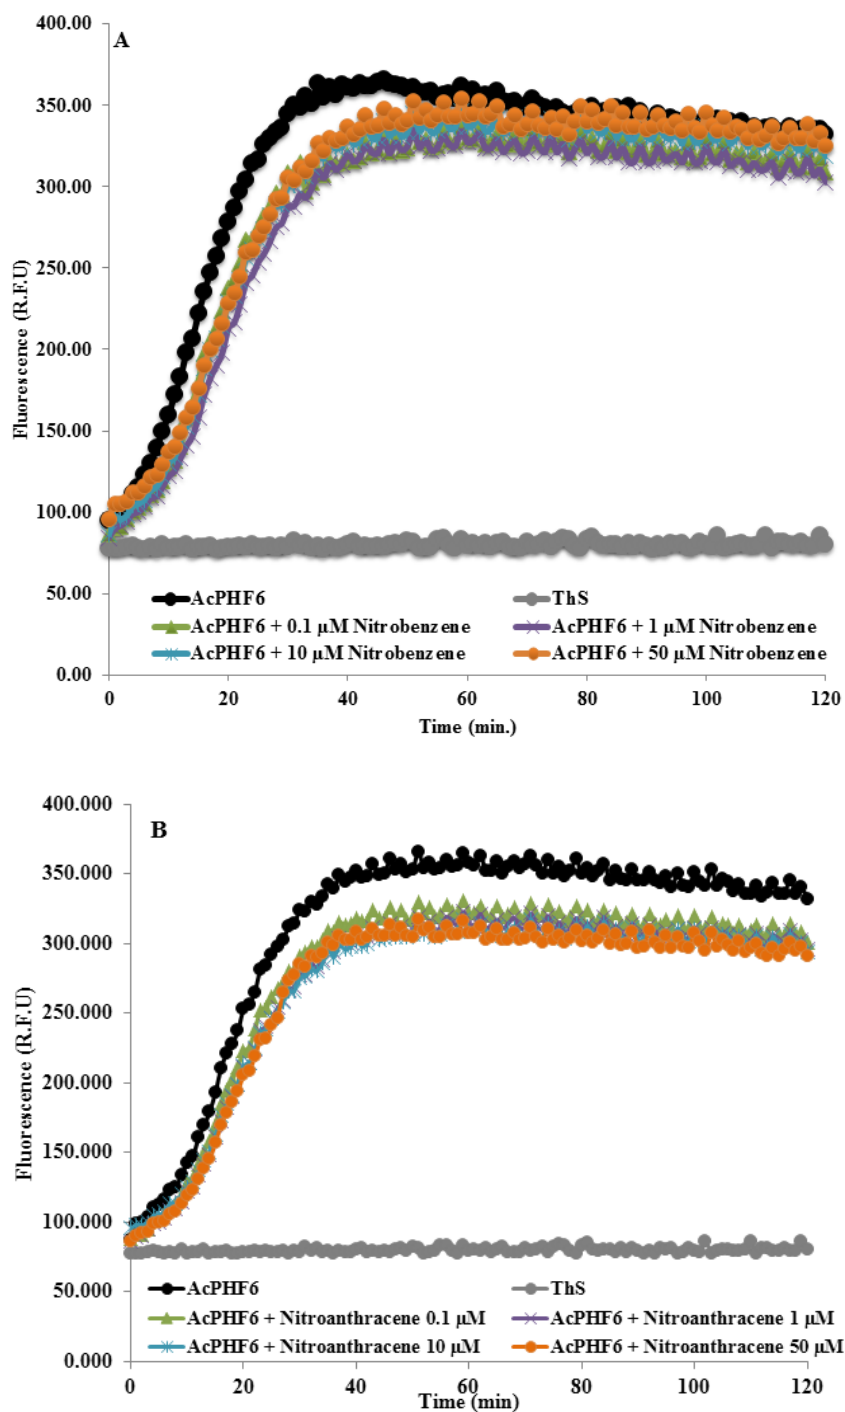

**Figure S5** The effect of various concentrations of methylbenzophenone **13** on AcPHF6 aggregation (in triplicates from two independent experiments).

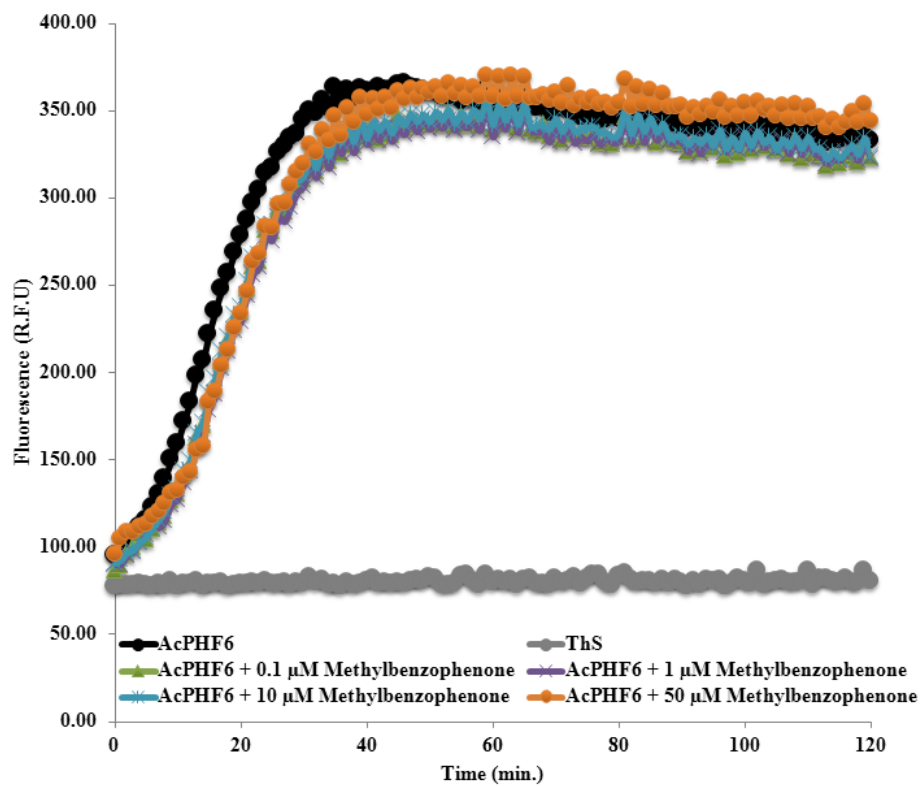

**Figure S6:** The UV scan of test compounds at 50  $\mu\text{M}$ . Experiments were done in triplicates.

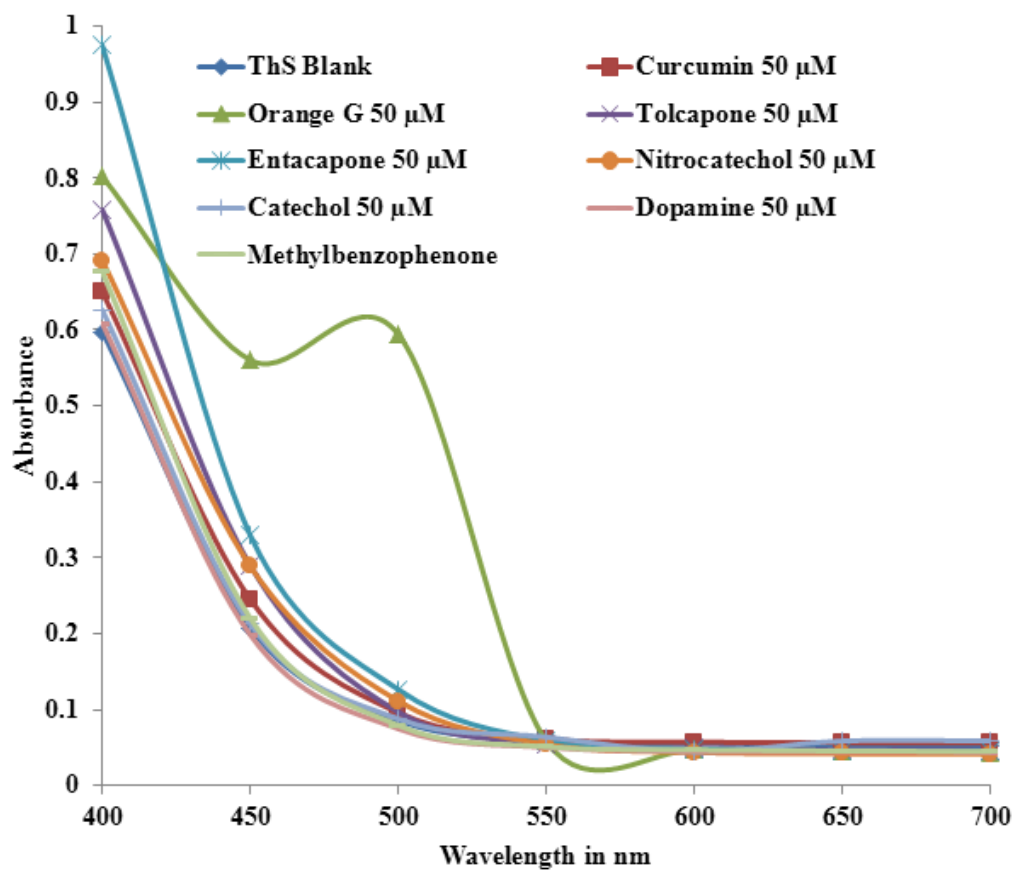

**Figure S7:** The fluorescence data of test compounds at 50  $\mu\text{M}$  (excitation wavelength = 440 nm and emission wavelength = 490 nm). Experiments were done in triplicates.

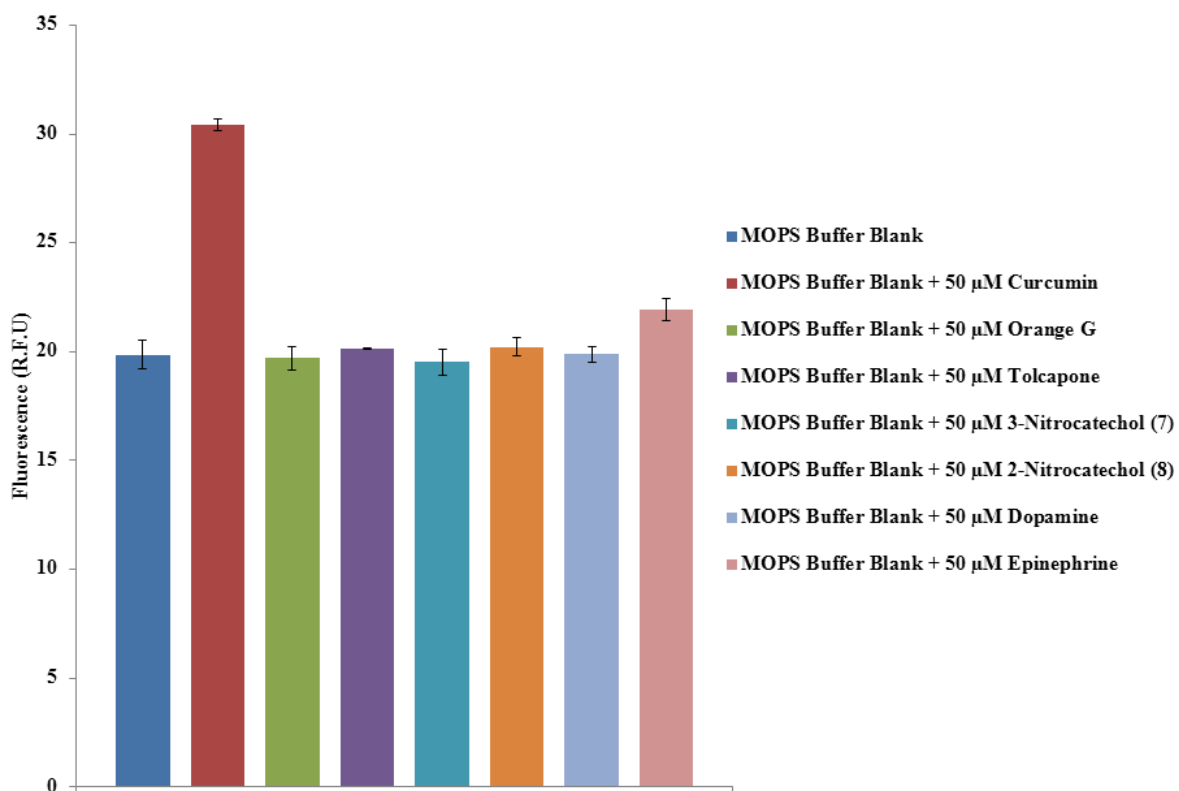



**Figure S8:** The fluorescence data obtained (excitation wavelength = 440 nm and emission wavelength = 490 nm) in presence of ThS, test compounds (50  $\mu\text{M}$ ) and MOPS buffer pH 7.2 after 120 min. Experiments were done in triplicates.

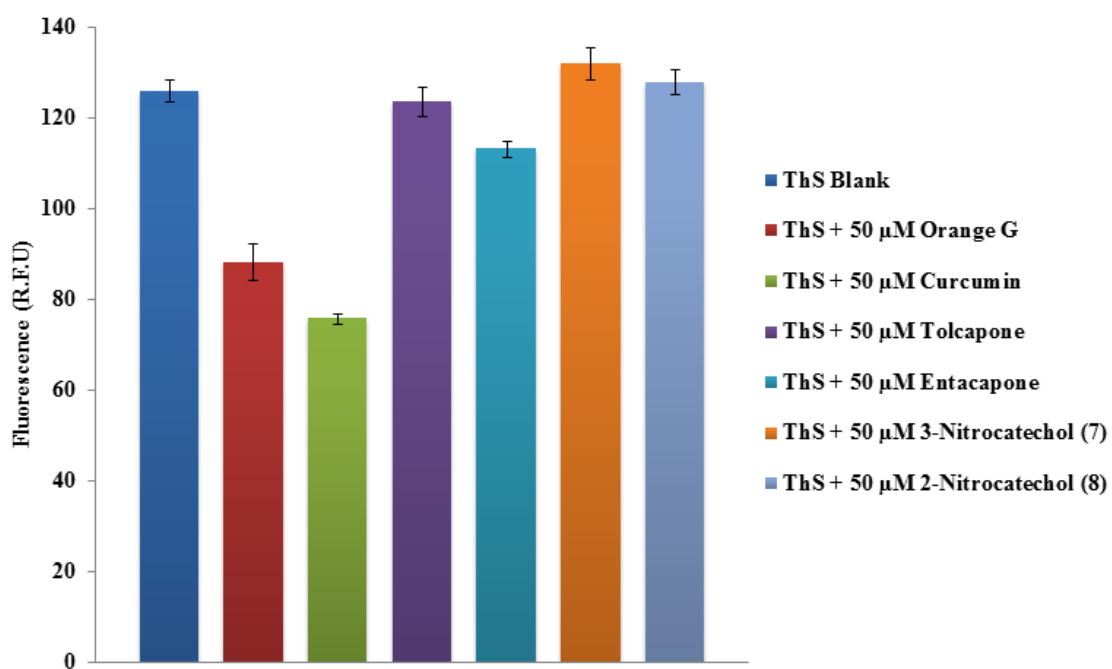

**Figure S9:** The AcPHF6 peptide (100  $\mu\text{M}$ ) disaggregation kinetics in presence of nitrocatechols **1**, **2**, **7** and **8** (50  $\mu\text{M}$  each) measured using ThS fluorescence (excitation wavelength = 440 nm and emission wavelength = 490 nm) in MOPS buffer pH 7.2 over a period of 24 h. Experiments were done in triplicates.

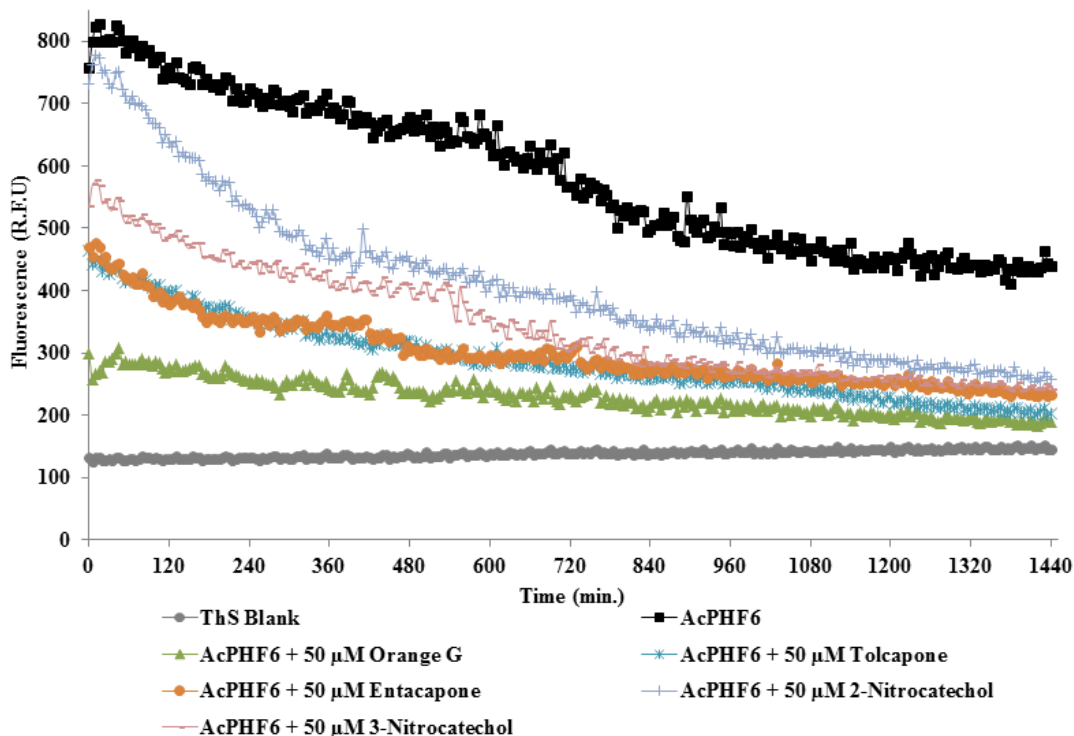

### AcPHF6 Disaggregation Assay

To investigate the disaggregation properties of nitrocatechols (**1**, **2**, **7** and **8**) on pre-formed AcPHF6 peptide aggregates, the ThS fluorescence was monitored over a 24-hour period in the presence or absence of test compounds. Initially, AcPHF6 aggregates were obtained by incubating 20  $\mu\text{L}$  of ThS, 140  $\mu\text{L}$  of 20 mM MOPS buffer (pH 7.2) and 20  $\mu\text{L}$  of AcPHF6 (100  $\mu\text{M}$  final well concentration) in a 96-well plate (Costar, black clear bottom) over a 2 h period. The plate was gently mixed for 25 seconds and fluorescence was monitored (excitation 440 nm / emission 490 nm) at 5 min. intervals with 5 second shaking in between each reading. After the 2 h aggregation period, test compounds (orange G, tolcapone, entacapone, 2-nitrocatechol or 3-nitrocatechol, final well concentration of 50  $\mu\text{M}$ ) were added to pre-formed AcPHF6 aggregates. The plate was gently mixed for 25 seconds prior to fluorescence monitoring (excitation 440 nm / emission 490 nm) for 24 hours at 5 min. intervals with 5 second shaking in between each reading (triplicate measurements).

**Figure S10:** (A) The binding mode of dopamine (**3**, ball and stick) and (B) catechol (**9**, ball and stick) in the steric zipper model of tau-derived-hexapeptide  $^{306}\text{VQIVYK}^{311}$ . Two layers of fiber made up of individual  $\beta$ -strands are shown. The hydrogen atoms are removed for clarity. Distance parameters are shown in red ( $\text{\AA}$  units).

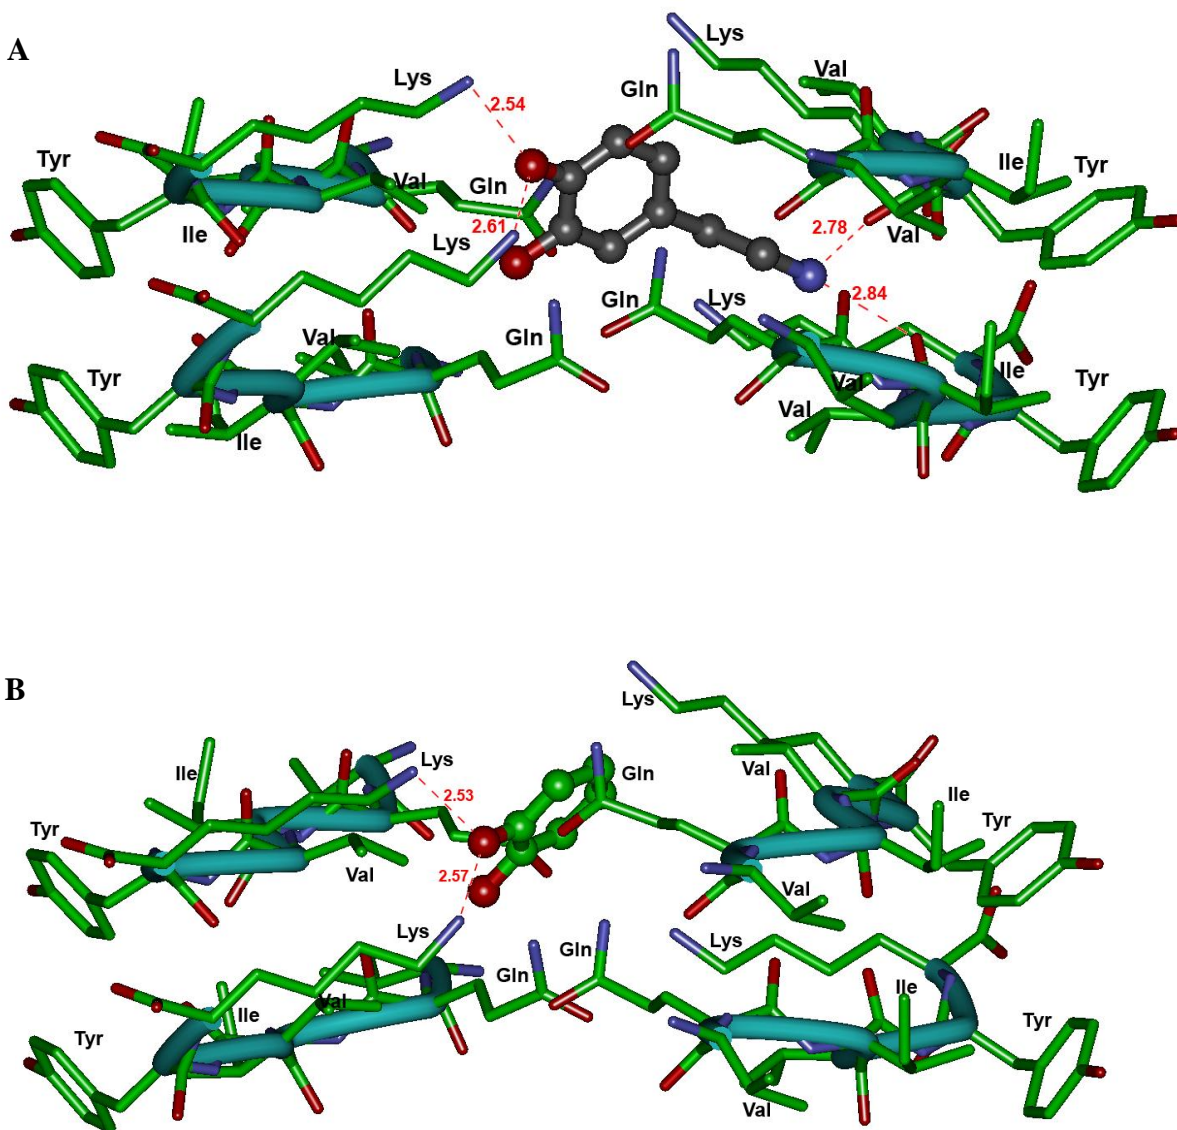

**Table S1:** The partition coefficient values (ClogP) of test compounds **1–13**

---

| <b>Compound</b>              | <b>ClogP<sup>a</sup></b> |
|------------------------------|--------------------------|
| Tolcapone ( <b>1</b> )       | 3.24                     |
| Entacapone ( <b>2</b> )      | 1.76                     |
| Dopamine ( <b>3</b> )        | 0.17                     |
| Epinephrine ( <b>4</b> )     | -0.68                    |
| Chloramphenicol ( <b>5</b> ) | 1.28                     |
| Nifedipine ( <b>6</b> )      | 3.12                     |
| ( <b>7</b> )                 | 1.44                     |
| ( <b>8</b> )                 | 1.37                     |
| ( <b>9</b> )                 | 0.87                     |
| ( <b>10</b> )                | 1.85                     |
| ( <b>11</b> )                | 1.88                     |
| ( <b>12</b> )                | 4.23                     |
| ( <b>13</b> )                | 3.67                     |

---

<sup>a</sup> ClogP value was determined using ChemDraw Ultra 12.0. CambridgeSoft Company
